# Supplementary material for: Antioxidative Effects of Chrysoeriol via Activation of the Nrf2 Signaling Pathway and Modulation of Mitochondrial Function
Source: PubMed Central journal article supplement (PMC7826659; doi:10.3390/molecules26020313), 2021-01-09
Supplement: molecules-26-00313-s001.pdf [file molecules-26-00313-s001.pdf]

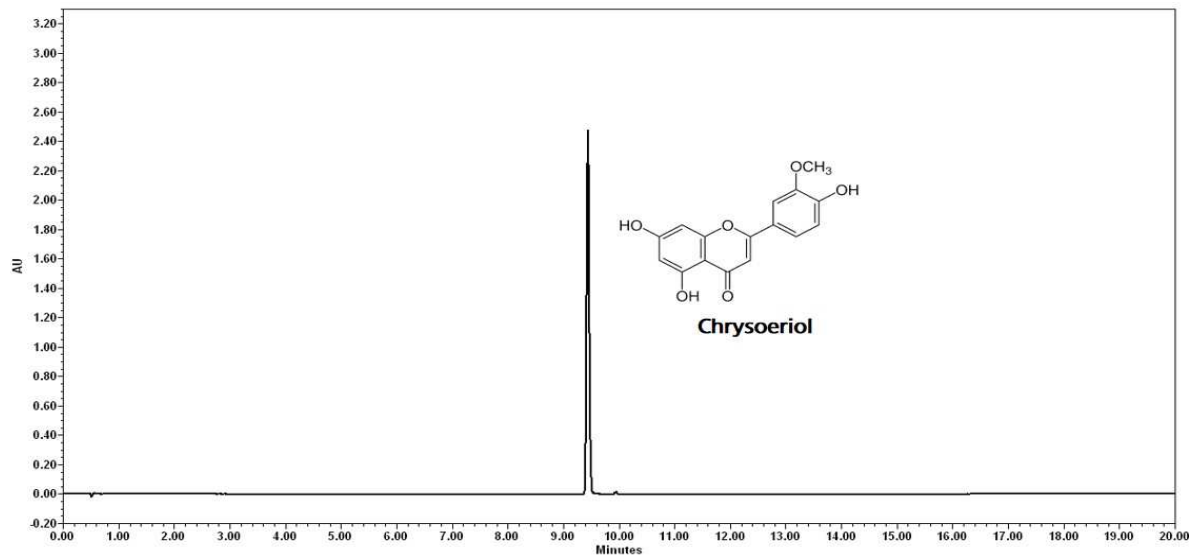

**Supplementary Figure 1. UHPLC chromatogram of chrysoeriol compound (purity > 98%)**
